# Supplementary material for: PEG Graft Polymer Carriers of Antioxidants: In Vitro Evaluation for Transdermal Delivery
Source: PubMed Central journal article supplement (PMC7761655; doi:10.3390/pharmaceutics12121178), 2020-12-03
Supplement: pharmaceutics-12-01178-s001.pdf [file pharmaceutics-12-01178-s001.pdf]

Article

# Supplementary Materials: PEG Graft Polymer Carriers of Antioxidants: In Vitro Evaluation for Transdermal Delivery

Justyna Odrobińska, Magdalena Skonieczna, and Dorota Neugebauer

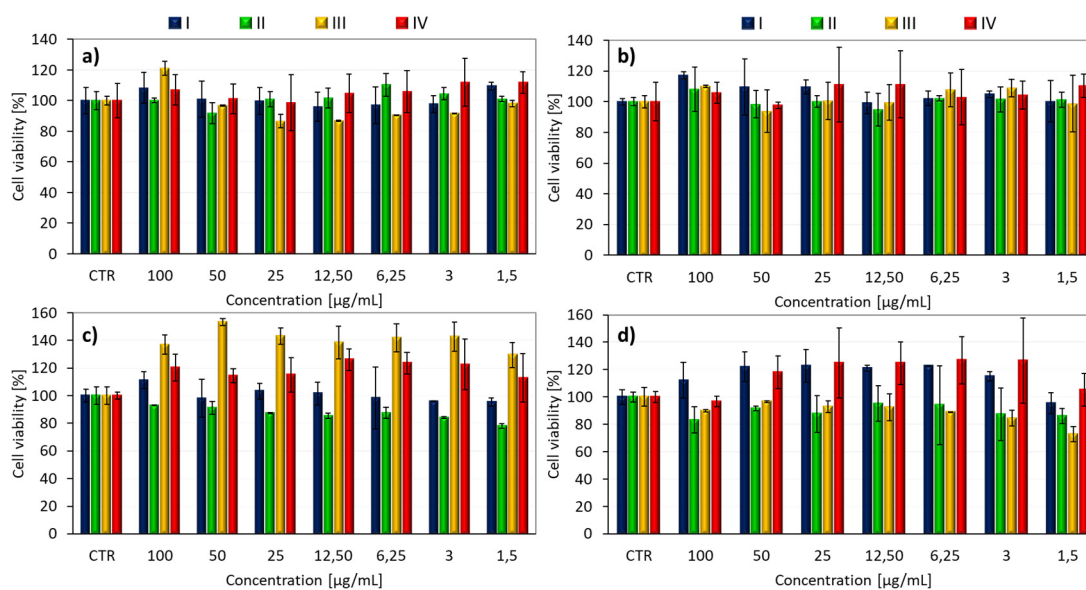

**Figure S1.** In vitro cytotoxicity effect of carriers on (a) NHDF, (b) HaCaT, (c) Me45, (d) 451-Lu.

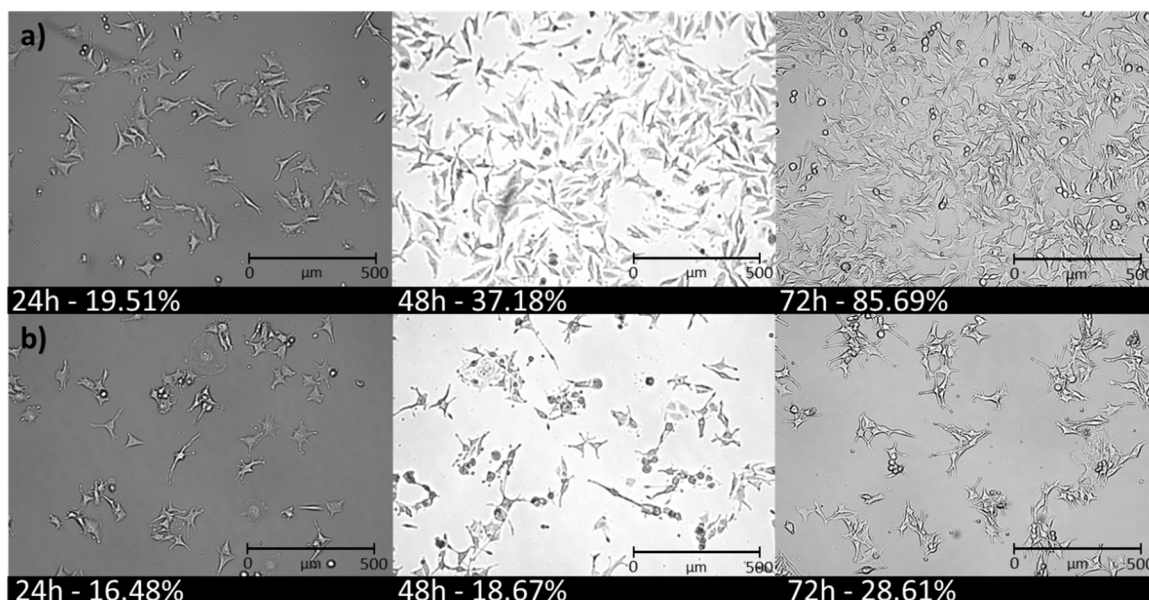

**Figure S2.** Increase in confluency of (a) Me45, (b) 451-Lu cells treated with compound III (c = 100 µg/mL).

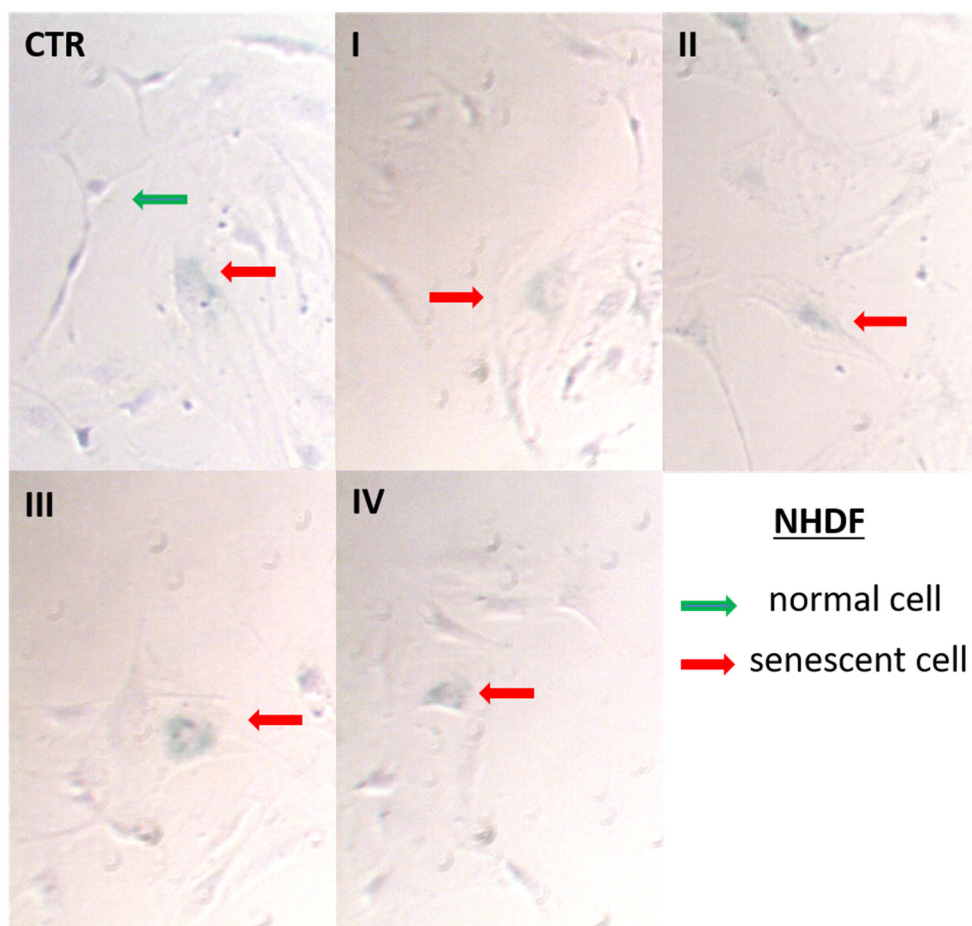

**Figure S3.** Microscopic visualization of NHDF cell line after senescence test.

**Table S1.** Average cell confluence after 72h.

| conc. [ $\mu\text{g/mL}$ ] | Me45 (%) |       | 451-Lu (%) |       |
|----------------------------|----------|-------|------------|-------|
|                            | 0        | 100   | 0          | 100   |
| CTR                        | 53.26    | -     | 25.94      | -     |
| I                          |          | 86.70 |            | 32.48 |
| II                         |          | 85.28 |            | 37.95 |
| III                        |          | 85.96 |            | 26.04 |
| IV                         |          | 81.98 |            | 33.87 |

**Table S2.** NHDF and HaCaT cell cycle after carrier addition followed by 72 h of incubation in comparison to untreated controls (CTR).

|                            | NHDF (%) |       |     |      | HaCaT (%) |       |      |      |
|----------------------------|----------|-------|-----|------|-----------|-------|------|------|
|                            | subG1    | G0/G1 | S   | G2/M | subG1     | G0/G1 | S    | G2/M |
| CTR                        | 17.9     | 62.3  | 6.7 | 13.0 | 9.5       | 60.2  | 18.7 | 11.6 |
| I - 3 $\mu\text{g/mL}$     | 19.5     | 65.7  | 4.8 | 9.9  | 10.7      | 56.2  | 17.3 | 15.8 |
| I - 100 $\mu\text{g/mL}$   | 19.4     | 67.7  | 4.2 | 8.7  | 13.8      | 54.7  | 19.4 | 12.2 |
| II - 3 $\mu\text{g/mL}$    | 21.4     | 60.5  | 6.5 | 11.6 | 8.7       | 57.7  | 18.5 | 15.1 |
| II - 100 $\mu\text{g/mL}$  | 22.6     | 61.0  | 5.6 | 10.7 | 12.6      | 54.7  | 20.0 | 12.6 |
| III - 3 $\mu\text{g/mL}$   | 22.2     | 62.6  | 5.0 | 10.2 | 8.4       | 58.0  | 19.0 | 14.6 |
| III - 100 $\mu\text{g/mL}$ | 25.9     | 53.2  | 7.6 | 13.3 | 8.1       | 32.2  | 26.1 | 33.6 |
| IV - 3 $\mu\text{g/mL}$    | 26.0     | 60.9  | 4.7 | 8.4  | 8.0       | 58.7  | 19.2 | 14.2 |
| IV - 100 $\mu\text{g/mL}$  | 26.3     | 50.2  | 9.5 | 14.0 | 9.9       | 27.4  | 24.5 | 38.2 |

**Table S3.** Me45 cell cycle after carrier addition followed by 72 h of incubation in comparison to untreated controls (CTR).

|                 | Me45 (%) |       |     |      |
|-----------------|----------|-------|-----|------|
|                 | subG1    | G0/G1 | S   | G2/M |
| CTR             | 2.9      | 86.7  | 2.8 | 7.6  |
| I - 3 µg/mL     | 2.5      | 90.5  | 2.3 | 4.7  |
| I - 100 µg/mL   | 2.4      | 91.1  | 2.2 | 4.4  |
| II - 3 µg/mL    | 2.9      | 90.9  | 2.7 | 3.6  |
| II - 100 µg/mL  | 2.6      | 91.2  | 2.7 | 3.5  |
| III - 3 µg/mL   | 3.5      | 86.1  | 3.8 | 6.5  |
| III - 100 µg/mL | 4.1      | 88.9  | 2.4 | 4.7  |
| IV - 3 µg/mL    | 2.9      | 87.5  | 3.0 | 6.5  |
| IV - 100 µg/mL  | 3.1      | 90.0  | 2.3 | 4.6  |

**Table S4.** Results of Annexin V/PI double staining apoptosis assay in NHDF cells.

| NHDF | Carrier concentration [µg/mL] | % of cells ± S.D. |             |             |             |
|------|-------------------------------|-------------------|-------------|-------------|-------------|
|      |                               | A-/PI-            | A-/PI+      | A+/PI-      | A+/PI+      |
| CTR  | 0                             | 95.82 ± 0.24      | 1.36 ± 0.18 | 1.64 ± 0.15 | 1.17 ± 0.13 |
| I    | 3                             | 95.34 ± 0.85      | 2.29 ± 0.50 | 1.37 ± 0.16 | 0.99 ± 0.37 |
| II   |                               | 94.45 ± 0.49      | 2.55 ± 0.12 | 1.47 ± 0.30 | 1.52 ± 0.21 |
| III  |                               | 92.26 ± 0.79      | 2.41 ± 0.39 | 2.99 ± 0.33 | 2.34 ± 0.14 |
| IV   |                               | 93.77 ± 0.65      | 2.36 ± 0.53 | 2.48 ± 0.38 | 1.39 ± 0.20 |
| I    | 100                           | 95.42 ± 0.24      | 1.62 ± 0.14 | 1.45 ± 0.17 | 1.52 ± 0.23 |
| II   |                               | 95.27 ± 0.16      | 2.25 ± 0.29 | 1.24 ± 0.16 | 1.24 ± 0.20 |
| III  |                               | 82.95 ± 0.74      | 6.19 ± 0.45 | 5.26 ± 0.49 | 5.59 ± 0.27 |
| IV   |                               | 81.78 ± 0.62      | 6.18 ± 0.39 | 6.49 ± 0.75 | 5.55 ± 0.29 |

A-/PI-: Live cells; A-/PI+: Necrosis; A+/PI-: Early apoptosis; A+/PI+: Late apoptosis.

**Table S5.** Results of Annexin V/PI double staining apoptosis assay in HaCaT cells.

| HaCaT | Carrier concentration [µg/mL] | % of cells ± S.D. |              |             |             |
|-------|-------------------------------|-------------------|--------------|-------------|-------------|
|       |                               | A-/PI-            | A-/PI+       | A+/PI-      | A+/PI+      |
| CTR   | 0                             | 85.07 ± 0.67      | 14.58 ± 0.72 | 0.19 ± 0.06 | 0.17 ± 0.04 |
| I     | 3                             | 84.34 ± 1.28      | 15.05 ± 1.30 | 0.23 ± 0.07 | 0.39 ± 0.10 |
| II    |                               | 79.91 ± 0.32      | 18.70 ± 0.18 | 0.42 ± 0.04 | 0.98 ± 0.14 |
| III   |                               | 81.74 ± 0.70      | 17.55 ± 0.71 | 0.25 ± 0.04 | 0.45 ± 0.09 |
| IV    |                               | 78.77 ± 0.79      | 20.62 ± 0.78 | 0.19 ± 0.04 | 0.42 ± 0.10 |
| I     | 100                           | 88.50 ± 0.83      | 11.26 ± 0.80 | 0.05 ± 0.02 | 0.19 ± 0.05 |
| II    |                               | 90.66 ± 1.19      | 9.12 ± 1.13  | 0.08 ± 0.03 | 0.14 ± 0.08 |
| III   |                               | 83.40 ± 0.80      | 14.94 ± 0.44 | 0.34 ± 0.13 | 1.32 ± 0.42 |
| IV    |                               | 87.67 ± 1.12      | 11.64 ± 1.05 | 0.21 ± 0.06 | 0.48 ± 0.16 |

A-/PI-: Live cells; A-/PI+: Necrosis; A+/PI-: Early apoptosis; A+/PI+: Late apoptosis.

**Table S6.** Results of Annexin V/PI double staining apoptosis assay in Me45 cells.

| Me45       | Carrier concentration [ $\mu\text{g/mL}$ ] | % of cells $\pm$ S.D. |                  |                 |                 |
|------------|--------------------------------------------|-----------------------|------------------|-----------------|-----------------|
|            |                                            | A-/PI-                | A-/PI+           | A+/PI-          | A+/PI+          |
| <b>CTR</b> | 0                                          | 90.22 $\pm$ 1.63      | 9.68 $\pm$ 1.60  | 0.03 $\pm$ 0.02 | 0.07 $\pm$ 0.03 |
| <b>I</b>   | 3                                          | 91.72 $\pm$ 1.42      | 8.20 $\pm$ 1.39  | 0.01 $\pm$ 0.01 | 0.07 $\pm$ 0.04 |
| <b>II</b>  |                                            | 92.10 $\pm$ 1.51      | 7.80 $\pm$ 1.50  | 0.01 $\pm$ 0.01 | 0.09 $\pm$ 0.03 |
| <b>III</b> |                                            | 91.04 $\pm$ 1.61      | 8.71 $\pm$ 1.52  | 0.05 $\pm$ 0.04 | 0.19 $\pm$ 0.07 |
| <b>IV</b>  |                                            | 90.90 $\pm$ 1.54      | 8.94 $\pm$ 1.51  | 0.02 $\pm$ 0.01 | 0.14 $\pm$ 0.05 |
| <b>I</b>   | 100                                        | 86.05 $\pm$ 1.49      | 13.86 $\pm$ 1.45 | 0.01 $\pm$ 0.01 | 0.08 $\pm$ 0.04 |
| <b>II</b>  |                                            | 87.60 $\pm$ 2.50      | 12.30 $\pm$ 2.48 | 0.01 $\pm$ 0.01 | 0.10 $\pm$ 0.04 |
| <b>III</b> |                                            | 85.53 $\pm$ 2.21      | 14.23 $\pm$ 2.20 | 0.04 $\pm$ 0.03 | 0.19 $\pm$ 0.06 |
| <b>IV</b>  |                                            | 89.68 $\pm$ 1.79      | 10.12 $\pm$ 1.78 | 0.04 $\pm$ 0.01 | 0.15 $\pm$ 0.05 |

A-/PI-: Live cells; A-/PI+: Necrosis; A+/PI-: Early apoptosis; A+/PI+: Late apoptosis.
